# Supplementary material for: Comparison and impact of COVID-19 for patients with cancer: a survival analysis of fatality rate controlling for age, sex and cancer type
Source: HighWire-hosted journal article supplement (doi:10.1136/bmjhci-2021-100341), 2021-05-01
Supplement: bmjhci-2021-100341supp001_data_supplement.pdf [file bmjhci-2021-100341supp001_data_supplement.pdf]

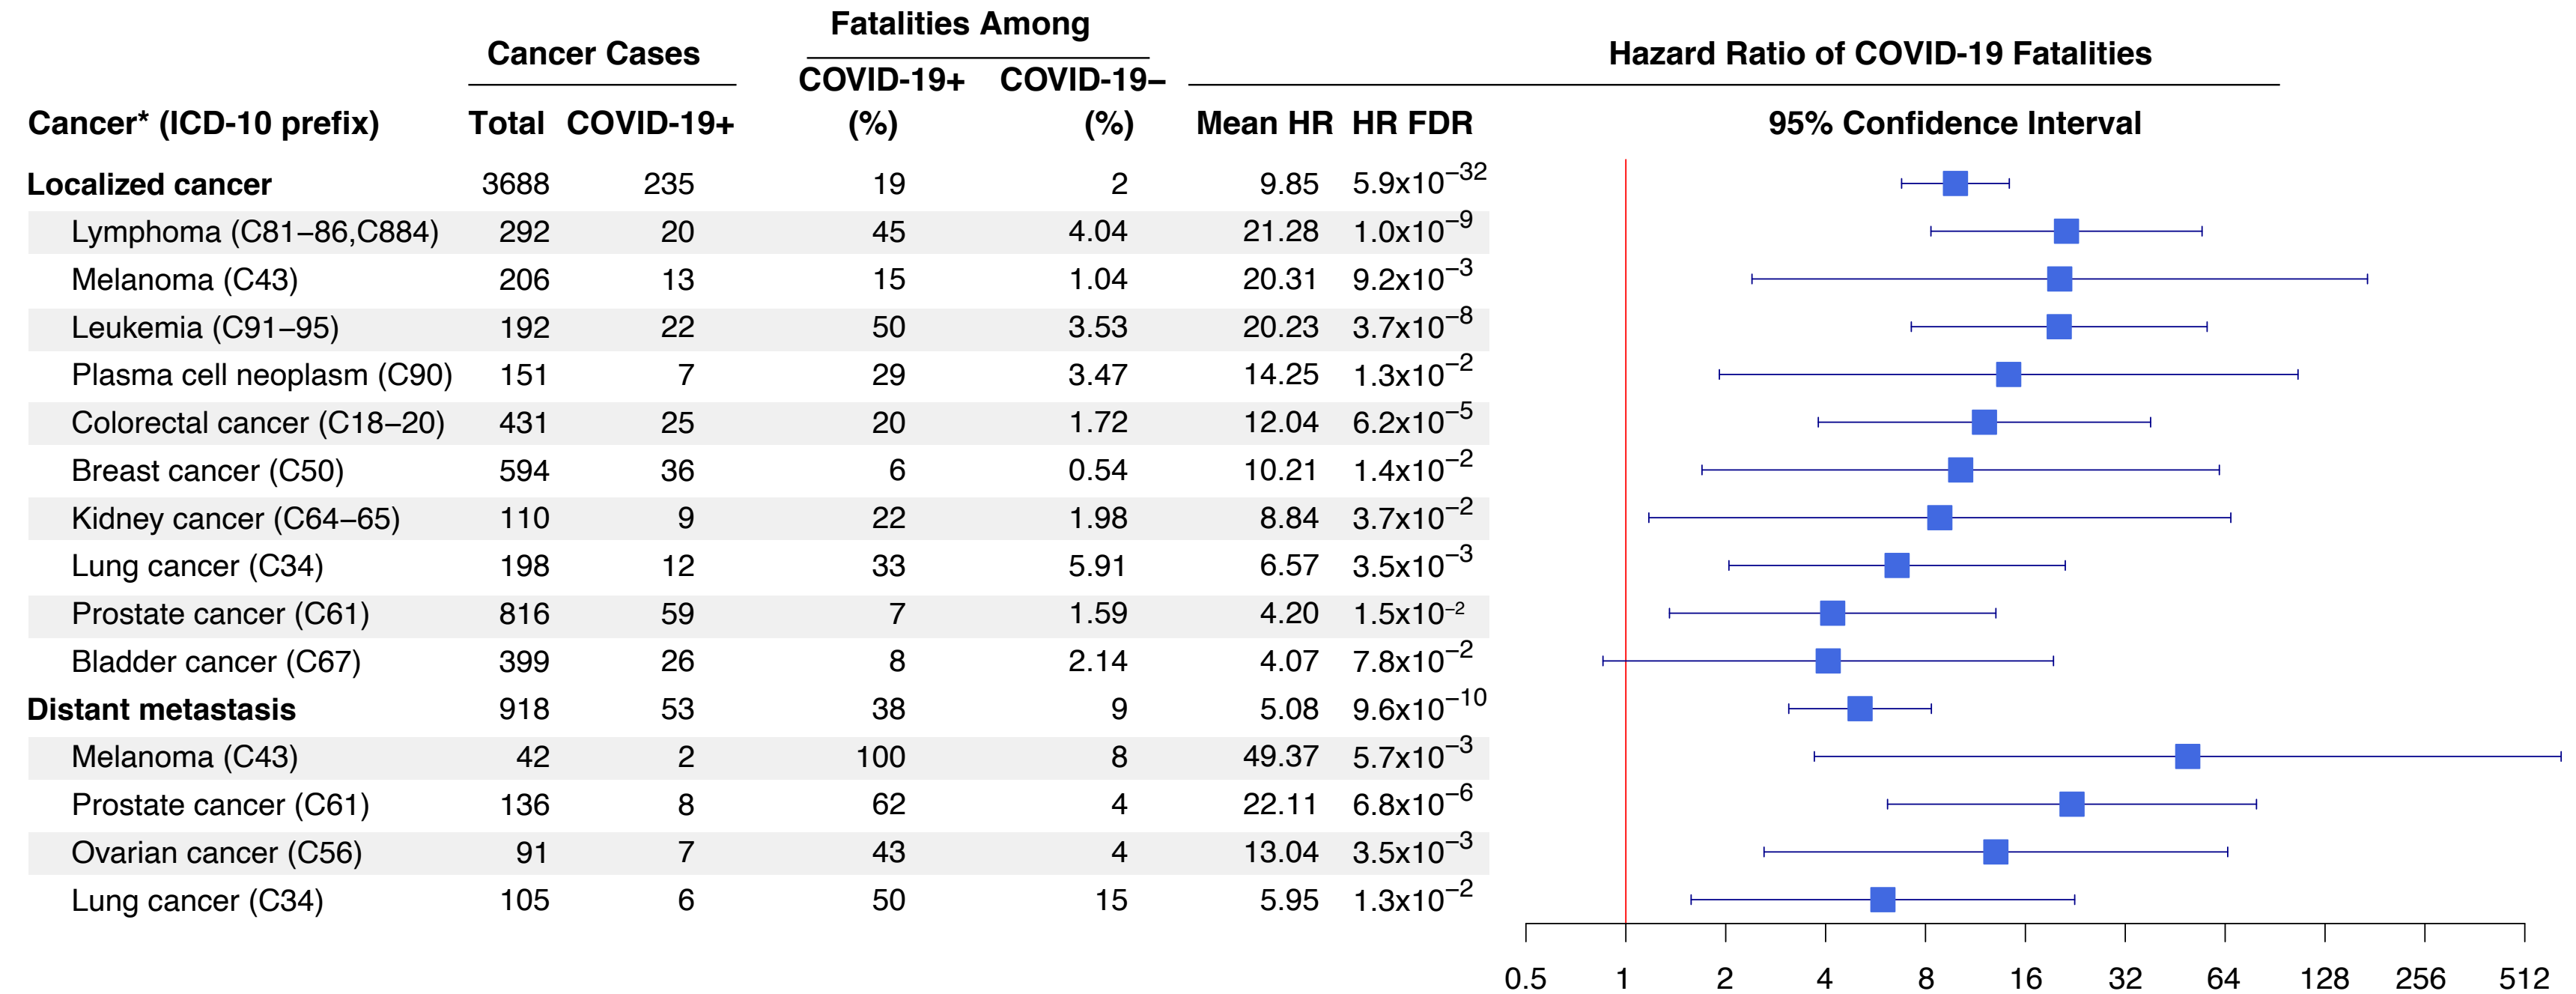

## Notes:

- 1) All stratified analyses use COVID-19 plus covariates sex and age.
- 2) Localized cancer type stratified studies included those with at least 100 localized cases.
- 3) Distant metastasis cancer type stratified studies included those with at least 40 metastasized cases, except colorectal, breast, and pancreatic cancers, which had no COVID-19 associated deaths.
